# Supplementary material
Source: HighWire-hosted journal article supplement (https://diabetes.diabetesjournals.org/content/suppl/2005/04/27/54.5.1331)
Supplement: OnlineAppendixPg1331.pdf [file OnlineAppendixPg1331.pdf]

# Supplementary data

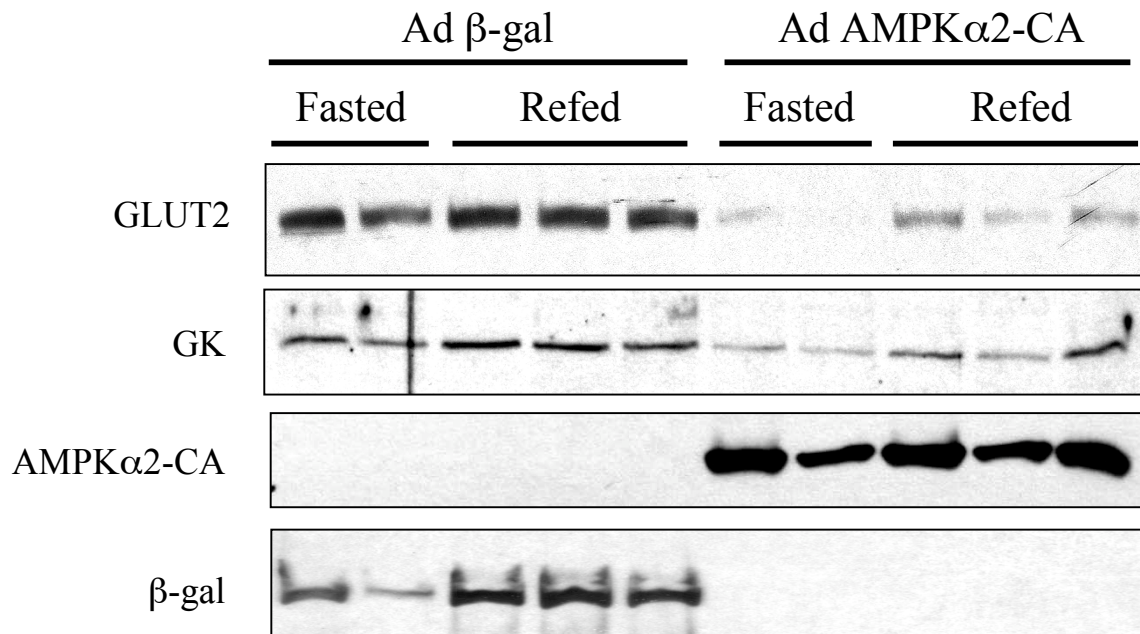

Supplementary data: Effect of hepatic AMPK $\alpha$ 2-CA expression on Glut2 and glucokinase (GK) protein levels in the livers of fasted and refed normal mice. Levels of the AMPK $\alpha$ 2-CA and  $\beta$ -galactosidase proteins are shown.
